# Supplementary material
Source: PubMed Central journal article supplement (PMC7826387)
Supplement: pnas.2019907118.sapp.pdf [file pnas.2019907118.sapp.pdf]

Supplementary Information for

## **Diversification of mammalian deltaviruses by host shifting**

Laura M. Bergner, Richard J. Orton, Alice Broos, Carlos Tello, Daniel J. Becker, Jorge E. Carrera, Arvind H. Patel, Roman Biek, Daniel G. Streicker

\*Corresponding authors: Laura Bergner ([Laura.Bergner@glasgow.ac.uk](mailto:Laura.Bergner@glasgow.ac.uk)) and Daniel Streicker ([Daniel.Streicker@glasgow.ac.uk](mailto:Daniel.Streicker@glasgow.ac.uk))

### **This PDF file includes:**

Supplementary Results  
Figures S1-S9  
Table S1-S6  
Dataset S1-S4 Descriptions  
Supplementary References

### **Other supplementary materials for this manuscript include the following:**

Dataset S1-S4

## Supplementary Results

### 1. Evaluation of continent level geographic biases in *Serratus* data

We sought to confirm that the sole detection of mammalian deltaviruses in the Americas in three different mammalian orders was unlikely to have arisen from sampling biases in the RNA sequence datasets that we analyzed. The main text illustrates geographic patterns at broad scales and shows that New World species were under-represented relative to Old World species, indicating that sampling biases were unlikely to explain the absence of deltaviruses from Old World species. However, we also examined biases at finer geographic and taxonomic scales, focusing on the mammalian SRA search query dataset for which there was species and continent level information. At the continent level, data volumes (in bases of RNA sequenced) declined from Asia ( $6.35e13$ ), Africa ( $2.89e13$ ), South America ( $7.99e12$ ), North America ( $4.93e12$ ), Europe ( $4.86e12$ ), to Australia ( $3.75e12$ ) (Fig S8). This implies that Africa (the previously assumed origin of HDV) has more than double the data of the Americas combined. Similar patterns were evident within the deltavirus-infected mammalian orders. For Artiodactyla, North and South American datasets were ranked 3<sup>rd</sup> and 5<sup>th</sup> respectively among the 5 continents which had sequence data. Although there was less Artiodactyla data from Africa than North America, Asia (1<sup>st</sup>) and Europe (2<sup>nd</sup>) had 2 and 1.6-fold more data than the Americas combined. For bats, North and South American datasets were ranked 5<sup>th</sup> and 6<sup>th</sup> among the 6 continents with data, and Europe (1<sup>st</sup>) and Africa (2<sup>nd</sup>) had 2.5 and 1.2-fold more data than datasets combined across the Americas. For rodents, North America datasets were ranked 2<sup>nd</sup>, while South American datasets were ranked 5<sup>th</sup> out of the 5 continents with data, but Asia (1<sup>st</sup>) had 1.1-fold more data than the Americas combined and Africa had 3.6 times more data than South America.

We also examined potential biases in search effort by number of species sequenced per continent. There were equal or fewer species of Artiodactyla sequenced in North ( $N = 5$ ) and South America ( $N=1$ ) compared to Europe ( $N = 5$ ), Asia ( $N = 8$ ) and Africa ( $N = 14$ ). Similarly, rodent species sampled from Old World continents ( $N = 48$ ; Europe [ $N = 8$ ], Africa [ $N = 14$ ], and Asia [ $N = 26$ ]) outnumbered those in the New World ( $N = 33$ ; North America [ $N = 21$ ], South America [ $N = 12$ ]). Neither Rodentia nor Artiodactyla datasets were searched from Australia. In contrast, there were more bat species in North and South American datasets ( $N = 4$  and  $42$ , respectively) compared to Asia ( $N = 22$ ), Africa ( $N = 5$ ), Europe ( $N = 2$ ), and Australia ( $N = 1$ ) leading to a slight bias toward New World bats (46 species vs 30 Old World species). Consequently, in the 'mammalian' dataset, New World bats were more numerous at the species level, but had fewer individuals tested per species and/or less sequencing depth per species.

We further examined datasets generated by related search queries (vertebrate, metagenome and virome) which included some libraries from mammals that were excluded from the 'mammalian' dataset (see Materials and Methods, Section 1e). The vertebrate dataset contained no matches to the three mammalian Orders of interest (Rodentia, Artiodactyla,

Chiroptera). For Rodentia, the metagenome dataset contained 380 libraries (9.7e7 bases) identified as “mouse metagenome” and the virome dataset contained 171 libraries (1e11 bases) which were identified as “mouse gut metagenome” or “rodent metagenome” or “Rattus” or “rat gut metagenome”. These could not be assigned geographic provenance and likely represented laboratory animals. For Artiodactyla, the virome dataset contained 317 libraries (1e11 bases) which were identified as “pig gut metagenome” or “pig metagenome” or “bovine gut metagenome”. As these libraries likely derived from either experimental or domestic animals, we conclude that additional data from these two Orders are unlikely to influence geographic or taxonomic bias. For Chiroptera, there were a total of 25 libraries (2.4e10 bases) identified as “bat metagenome”. The vast majority (N=24) were from Old World bats. Eleven derived from a study of bat rotaviruses (PRJNA562472) which of which 10 were collected from Old world locations (Ghana, Bulgaria) and one from New World (Costa Rica). Two libraries were bat viral metagenomes generated from samples collected in South Africa (SRR5889194; SRR5889129), and twelve libraries were generated from bats sampled in China (PRJNA379515). There were 14 bat species analyzed in all of these libraries, of which eight were not included in the mammalian SRA dataset, bringing the total number of Old World bat species to 38. Therefore, by the metric of number of species, New World bats remained slightly over-represented (38 versus 46 species) though as mentioned above, Old World bat derived datasets were sequenced more comprehensively and covered a larger number of continents.

Overall, across the three orders in which we detected deltaviruses, fewer species were studied in North and South American datasets (85 species) compared to those from Africa, Asia, Europe and Australia (105 species) and the total volume of RNA sequenced was 2.7 times greater for Old world species (1.64e13 bases RNA) than New world species (6.02e12). We therefore conclude that the exclusive presence of deltaviruses in American mammals is unlikely to represent geographic biases in our datasets.

## **2. Large delta antigen in novel mammalian deltaviruses**

In HDV, the large delta antigen protein (L-HDAg) is produced by RNA editing of the UAG stop codon to include 19 additional aa (1) and contains a farnesylation site which interacts with HBV (2). The DrDV-B DA<sub>g</sub> from the genome from bat colony CAJ1 terminated in UAG, which if edited similarly to HDV would generate a putative L-DA<sub>g</sub> containing an additional 28 aa (Fig. S3). In contrast, DrDV-B DA<sub>g</sub> from the two other bat colonies from which genomes were sequenced (LMA6 and AYA11), as well as DrDV-A DA<sub>g</sub>, terminated in a UAA stop codon so would not appear to be similarly edited, although it is possible to extend the open reading frames through frameshifting (3). Importantly, no putative vampire bat L-DA<sub>g</sub> generated through either RNA editing or frameshifting contained a farnesylation site. PmacDV, OvirDV, and MmonDV also did not contain apparent L-DA<sub>g</sub> extensions or farnesylation sites (4).

### 3. Co-phylogenetic results across posterior distributions of trees from two Bayesian searches and two different co-phylogeny analyses

Consensus topologies differed slightly between the phylogenetic analyses of deltaviruses using a multi-species coalescent model in StarBeast and a coalescent model in MrBayes, particularly in relation to the termite-associated deltavirus-like agent and avian deltavirus (compare Fig. 2A and 2B). We therefore repeated our co-phylogenetic analysis using 1,000 trees from the MrBayes analysis to verify that our conclusions were robust to this topological inconsistency. Analyses performed using virus distance matrices derived from posterior MrBayes trees were congruent with those in StarBeast.

In the broadest analyses of all taxa, results differed slightly among co-phylogenetic analyses. Specifically, PACo analyses supported the dependence of the deltavirus phylogeny on the host phylogeny (StarBeast trees:  $m^2_{xy} = 0.57$  (standard deviation = 0.48- 0.66);  $m^2_{xy\_null} = 1.27$  (1.11- 1.44);  $P = 0.01$ ; MrBayes trees: ( $m^2_{xy} = 0.53$  (0.46- 0.6);  $m^2_{xy\_null} = 1.26$  (1.1- 1.42);  $P = 0.002$ ). However, ParaFit analyses supported independence of the virus and host phylogenies based on both StarBeast trees (ParaFitGlobal = 0.72 (standard deviation = 0.59- 0.86);  $P = 0.09$ ) and MrBayes trees (ParaFitGlobal = 0.63 (0.52- 0.75);  $P = 0.07$ ). Similarly, for ingroup taxa (mammalian, avian and snake deltaviruses), PACo detected evidence of co-phylogeny using both sets of trees (Starbeast:  $m^2_{xy} = 0.81$  (0.66- 0.96);  $m^2_{xy\_null} = 1.3$  (1.14- 1.46);  $P = 0.02$ ; MrBayes:  $m^2_{xy} = 0.76$  (0.69- 0.83);  $m^2_{xy\_null} = 1.28$  (1.1- 1.46);  $P = 0.01$ ), while ParaFit analyses with StarBeast trees (ParaFitGlobal = 0.8 (0.7- 0.89);  $P = 0.12$ ) and MrBayes trees (ParaFitGlobal = 0.68 (0.62- 0.75);  $P = 0.09$ ) found no significant support for co-phylogeny.

All analyses of mammalian deltaviruses failed to reject the null hypothesis of independence of phylogenies. These results were consistent when with both StarBeast and MrBayes trees in PACo (StarBeast:  $m^2_{xy} = 1.51$  (1.36- 1.65);  $m^2_{xy\_null} = 1.66$  (1.43- 1.9);  $P = 0.28$ ; MrBayes:  $m^2_{xy} = 1.16$  (1.07- 1.25);  $m^2_{xy\_null} = 1.22$  (0.97- 1.48);  $P = 0.35$ ), as well as in ParaFit (StarBeast: ParaFitGlobal = 0.61 (0.55- 0.68);  $P = 0.52$ ; MrBayes: ParaFitGlobal = 0.49 (0.44- 0.54);  $P = 0.5$ ).

In summary, both PACo and ParaFit analyses of StarBeast and MrBayes trees showed no support for co-phylogeny in the mammalian dataset. Including more divergent host-virus pairs increased support for co-phylogeny in the all taxa and ingroup datasets, with these results being statistically significant in PACo analyses but not in ParaFit analyses. Inconsistent support for phylogenetic independence at broader scales may reflect variation in the sensitivity of different analyses to detect phylogenetic congruence which occurs in only a subset of branches. For example, the non-ingroup deltavirus-like agents formed a polytomy of long branches and were found in the most divergent hosts from mammals, which may have inflated co-phylogenetic signal (Fig. S5). Regardless, given the consistent evidence against a co-speciation model among mammals and incongruences observed among other taxa in the consensus topologies, these

findings illustrate that a model of co-speciation alone cannot explain the evolutionary relationships of deltaviruses and their hosts.

#### **4. Putative cross-species transmission of DrDV-B to a frugivorous bat.**

The detection of a vampire bat associated deltavirus in a frugivorous bat (*Carollia perspicillata*) is strongly suggestive of cross-species transmission but might also arise through mis-assignment of bat species in the field or contamination of samples during laboratory processing. To exclude the possibility of host species mis-identification, we confirmed morphological species assignment by sequencing Cytochrome B from the same saliva sample in which we amplified deltavirus (see Methods), which showed 99.49% identity with a published *C. perspicillata* sequence in Genbank (Accession AF511977.1). Laboratory contamination was minimized by processing all samples through a dedicated PCR pipeline with a one directional workflow. PCR reagents are stored and master mixes prepared in a laboratory that is DNA/RNA free, and which cannot be entered after going into any other lab. Field collected samples from bats are extracted and handled in a room strictly used for clinical samples which cannot be entered after going in any other lab aside from the master mix room. To further exclude laboratory contamination, we independently amplified the *C. perspicillata* deltavirus product from two separate batches of cDNA. We used only round 1 primers of a nested PCR to avoid detecting trace amounts of potential contamination; in vampire bats only 68% of individuals deemed positive after round 2 were also positive in round 1. Furthermore, in the laboratory, samples from other bat species were handled separately from samples collected from vampire bats, with extractions and PCRs being performed on different days. As discussed in the main text, the absence of genetic divergence from sympatric strains in *D. rotundus* indicates limited or no onward transmission of DrDV-B in *C. perspicillata*. Whether the *C. perspicillata* sustained an actively replicating infection is uncertain, although detection in a single round of PCR (which was true for only 68% of DrDV-positive vampire bats) implies an intensity of infection which could suggest DrDV replication in the recipient host, though this would require further testing to confirm. Definitively resolving the extent of DrDV-B replication could be achieved using a quantitative RT-PCR targeting the DrDV antigenome. Such assays do not currently exist and after the confirmatory testing above, in addition to metagenomic sequencing, we unfortunately would no longer have sufficient RNA available from the *C. perspicillata* bat to run such a test if it were available. In summary, we are confident that the individual in which the deltavirus was detected is a *C. perspicillata* and we believe the most likely explanation to be cross-species transmission in nature, though whether this represents an active infection remains uncertain.

#### **5. Candidate helper viruses of OvirDV and MmonDV**

We also examined viral communities in *O. virginianus* and *M. monax* libraries for candidate helpers. Given that MmonDV was detected in animals experimentally inoculated with *Woodchuck hepatitis virus* (WHV, a hepadnavirus), these libraries were unsurprisingly dominated by WHV,

but also contained reads matching to *Herpesviridae*, *Flaviviridae*, *Poxviridae* and *Retroviridae* (Figure S9). *O. virginianus* libraries contained *Poxviridae*, *Retroviridae*, and *Herpesviridae* reads. Consequently, reads matching to *Poxviridae* were detected in libraries for all deltavirus hosts which were studied here (DrDV-A, DrDV-B, PmacDV, MmonDV, OvirDV), although reads were less abundant than other viral taxa and could not always be decisively ruled out as false positives. Indeed, blastn analysis of poxvirus-like reads, which were originally identified by blastx, revealed that these reads frequently had poor correspondence to *Poxviridae* at the nucleotide level. Although there is no experimental evidence that poxviruses can produce infectious deltavirus particles, this putative ecological association may be worth considering in future studies of mammalian deltaviruses.

## Supplementary Figures

|                    | U81989 | AB118846 | AB118845 | AM183326 | AM183329 | AM183333 | AM183327 | AB037948 | OvirDV | MmonDV | DrDV-A | PmacDV | MKS98009 | DrDV-B | NC_040729 | NC_040845 | MN031240 | MN031239 | MK962760 | MK962759 |
|--------------------|--------|----------|----------|----------|----------|----------|----------|----------|--------|--------|--------|--------|----------|--------|-----------|-----------|----------|----------|----------|----------|
| U81989_HDV1        |        | 73.5     | 72.3     | 69.6     | 68.3     | 68.9     | 71.2     | 60.4     | 57.8   | 51.5   | 53     | 46.8   | 46.8     | 47.5   | 41.8      | 37.2      | 31.9     | 30.7     | 28.1     | 30.1     |
| AB118846_HDV2      | 73     |          | 76       | 74.7     | 74.1     | 71.5     | 72.5     | 62.5     | 58.7   | 52.6   | 54.5   | 47.5   | 47.4     | 48.2   | 42        | 37.5      | 33.2     | 31.7     | 28.5     | 30.2     |
| AB118845_HDV4      | 74.4   | 75.7     |          | 74.3     | 72.6     | 71.5     | 72.9     | 63.1     | 61.5   | 53.4   | 56.1   | 48     | 48       | 49     | 41.8      | 37.4      | 32.9     | 30.4     | 27.8     | 29.9     |
| AM183326_HDV5      | 70.9   | 77.1     | 75.3     |          | 74.7     | 72.6     | 72.1     | 61       | 58.6   | 51.2   | 55.1   | 47.8   | 47.8     | 48     | 42.4      | 37.8      | 32.2     | 31.5     | 28.3     | 30.7     |
| AM183329_HDV6      | 69.3   | 72       | 69.6     | 76.3     |          | 71.9     | 72.3     | 62.4     | 59.2   | 52.8   | 54.5   | 47.9   | 47.8     | 48.1   | 41.8      | 35.7      | 32.1     | 31.4     | 27.7     | 31.2     |
| AM183333_HDV7      | 68     | 72.6     | 70.2     | 77.3     | 72.6     |          | 75.4     | 60.9     | 58.7   | 51.1   | 52.1   | 46.9   | 46.9     | 47.3   | 42.8      | 36.3      | 31.2     | 31       | 27.9     | 30.1     |
| AM183327_HDV8      | 68.9   | 72.4     | 75.7     | 79.9     | 75.8     | 75.4     |          | 61.5     | 58.9   | 52.2   | 53.6   | 47.6   | 46.9     | 47.5   | 42.1      | 35.7      | 31.1     | 31.1     | 26.3     | 30.4     |
| AB037948_HDV3      | 66.8   | 63.2     | 66.1     | 65.7     | 64.6     | 63.3     | 64.7     |          | 55     | 50.6   | 52     | 46.5   | 46.1     | 46.7   | 41.4      | 35.7      | 30.1     | 29.8     | 26.7     | 30.1     |
| OvirDV             | 61     | 64.1     | 69.1     | 65.1     | 66.1     | 62.7     | 65.6     | 63       |        | 55.8   | 61.6   | 47     | 47.4     | 47.1   | 42.7      | 35.8      | 31.2     | 31.1     | 25.7     | 28.2     |
| MmonDV             | 55.4   | 57.4     | 60.3     | 56.4     | 54.7     | 54.5     | 54.9     | 59.4     | 67     |        | 56.9   | 45.8   | 46.2     | 45.9   | 43.5      | 33.7      | 28.5     | 29.4     | 23.4     | 27.4     |
| DrDV-A             | 62.6   | 63.6     | 64.4     | 62.6     | 61.4     | 60.1     | 60.5     | 60.4     | 74.7   | 70.1   |        | 47     | 47.4     | 47.6   | 43.3      | 36.3      | 29       | 28.5     | 24.4     | 27.5     |
| PmacDV             | 54.3   | 53.8     | 55.6     | 52.3     | 52.6     | 52.9     | 54.3     | 53.7     | 57.7   | 55.1   | 56.1   |        | 95.4     | 71.2   | 44.4      | 33.7      | 29       | 30       | 24.7     | 26.2     |
| MKS98009_PsemDV    | 54.8   | 53.8     | 56.1     | 52.8     | 54.2     | 53.4     | 54.8     | 54.7     | 58.2   | 55.1   | 56.1   | 96.9   |          | 72.6   | 43.8      | 33.7      | 29.4     | 30.1     | 24.2     | 26.3     |
| DrDV-B_CA1         | 52.8   | 51.8     | 53.1     | 51.8     | 51.6     | 49.9     | 52.3     | 54.2     | 56.1   | 55.1   | 56.7   | 79.6   | 81.1     |        | 43.7      | 34.5      | 29.7     | 29.6     | 24.7     | 27.3     |
| NC_040729_SnakeDV  | 50     | 47.2     | 47.7     | 46.2     | 47.8     | 45.9     | 45.2     | 47.8     | 50.8   | 50.3   | 51.8   | 53     | 54.5     | 53     |           | 34.2      | 28.7     | 27.1     | 23.2     | 26.2     |
| NC_040845_AvianDV  | 40.7   | 36.2     | 39.4     | 36.7     | 35.7     | 37.9     | 36.2     | 38.9     | 37.2   | 39.9   | 38.3   | 34.7   | 35.3     | 37.9   | 34.9      |           | 25.7     | 30.4     | 24.9     | 25.4     |
| MN031240_FishDV    | 19.8   | 18.9     | 20.9     | 19.9     | 20.4     | 18.5     | 20.4     | 19.9     | 23.4   | 22.5   | 20.9   | 19.3   | 19.3     | 21.3   | 17.1      | 16.1      |          | 24.5     | 22.1     | 24.4     |
| MN031239_NewtDV    | 21.8   | 20.6     | 19.7     | 20.6     | 18.9     | 19       | 20.2     | 20.2     | 19.6   | 18.8   | 20.1   | 16.9   | 17.3     | 17.8   | 16.7      | 21.1      | 14.7     |          | 22.9     | 24.3     |
| MK962760_ToadDV    | 20.7   | 24.6     | 20.9     | 20.9     | 20.4     | 21       | 19.3     | 19.9     | 18.2   | 20.4   | 20.9   | 20.2   | 20.2     | 18.6   | 18.4      | 20.1      | 16.8     |          | 16.2     | 19.8     |
| MK962759_TermiteDV | 20     | 18.2     | 20.1     | 21.6     | 19.7     | 22.2     | 21.1     | 21.1     | 20.1   | 19.7   | 21.6   | 19     | 21       | 20.5   | 18.8      | 21.5      | 10.8     | 14.9     |          | 10.4     |

**Fig. S1.** Genetic distances matrices showing representative deltavirus sequences with percent nucleotide identities between genomes (upper triangle) and percent amino acid identities between complete DA<sub>g</sub> sequences (lower triangle). Darker shading indicates higher percentage identity between two deltaviruses.

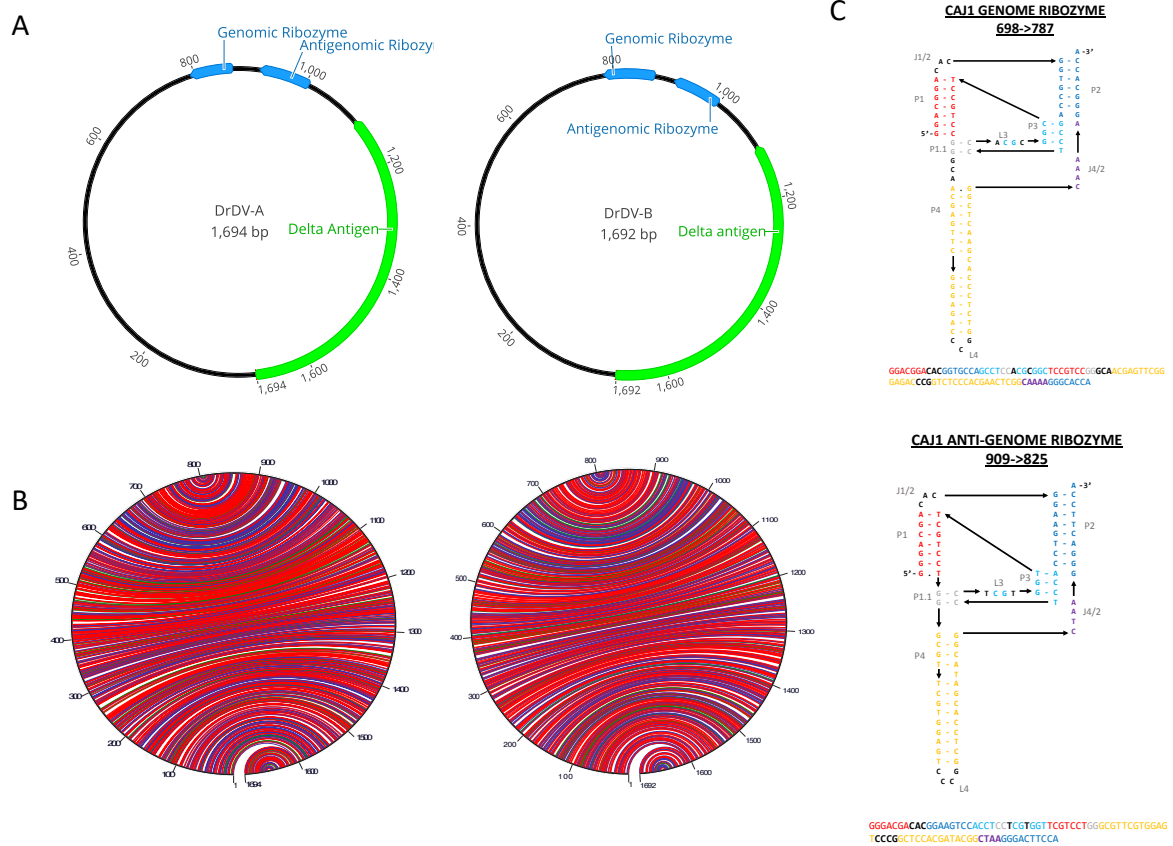

**Fig. S2. DrDV genomes exhibit characteristics common to deltaviruses.** (A) The locations of the delta antigen open reading frame (green) and genomic/antigenomic ribozymes (blue) are shown along the circular genomes of DrDV-A and DrDV-B (CAJ1 shown as an example of DrDV-B). (B) Intramolecular base pairing for DrDVs depicted as lines connecting points on the circular genome – G-C pairs are red, A-U pairs are blue, G-U pairs are green, other pairs are yellow. (C) Genomic and antigenomic ribozyme secondary structures are shown along with genome location for genome CAJ1. Complementary regions are shown in the same color, and structures are depicted in the style of Webb & Luptak to facilitate comparison with ribozymes from previous studies (3, 5, 6). For further comparison, the ribozyme structures presented in (4) are based on a consensus ribozyme sequence created from an alignment of all deltavirus and deltavirus-like ribozymes. Unlike ribozyme sequences in some other deltavirus genomes, we do not observe a shortening of the J1/2 loop in the DrDV genomic ribozyme compared to the anti-genomic ribozyme, with the sequence CAC present in both.



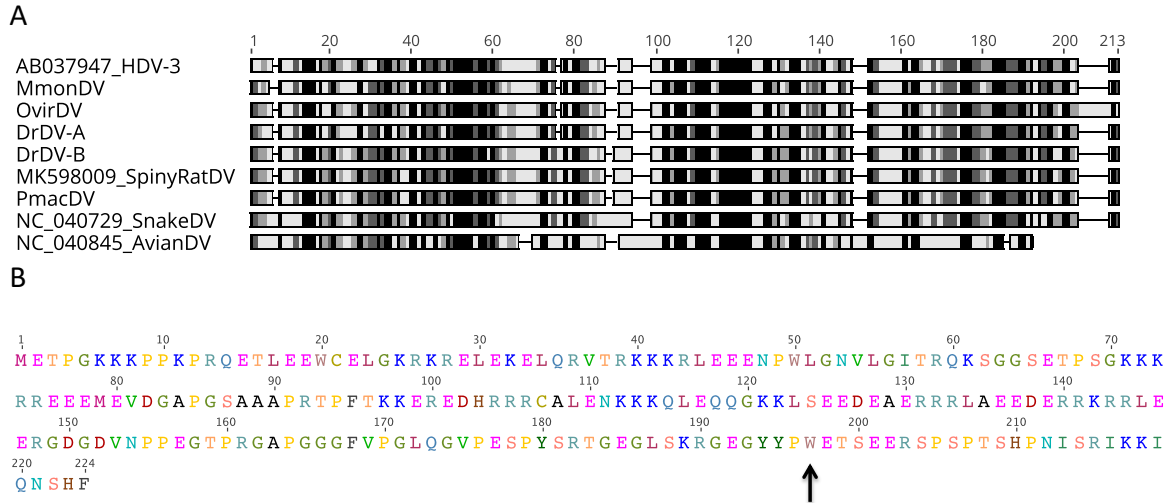

**Fig. S3. Characterization of DrDV delta antigen proteins. (A)** Alignment of delta antigen protein sequences for mammalian, snake and avian deltaviruses. Shading indicates level of similarity across all sequences, with regions of highest identity in black. **(B)** Putative sequence of the large DAG for the DrDV-B virus from the site CAJ1. The RNA editing site is marked with a black arrow; UAG has been edited to UGG yielding a tryptophan residue (W).

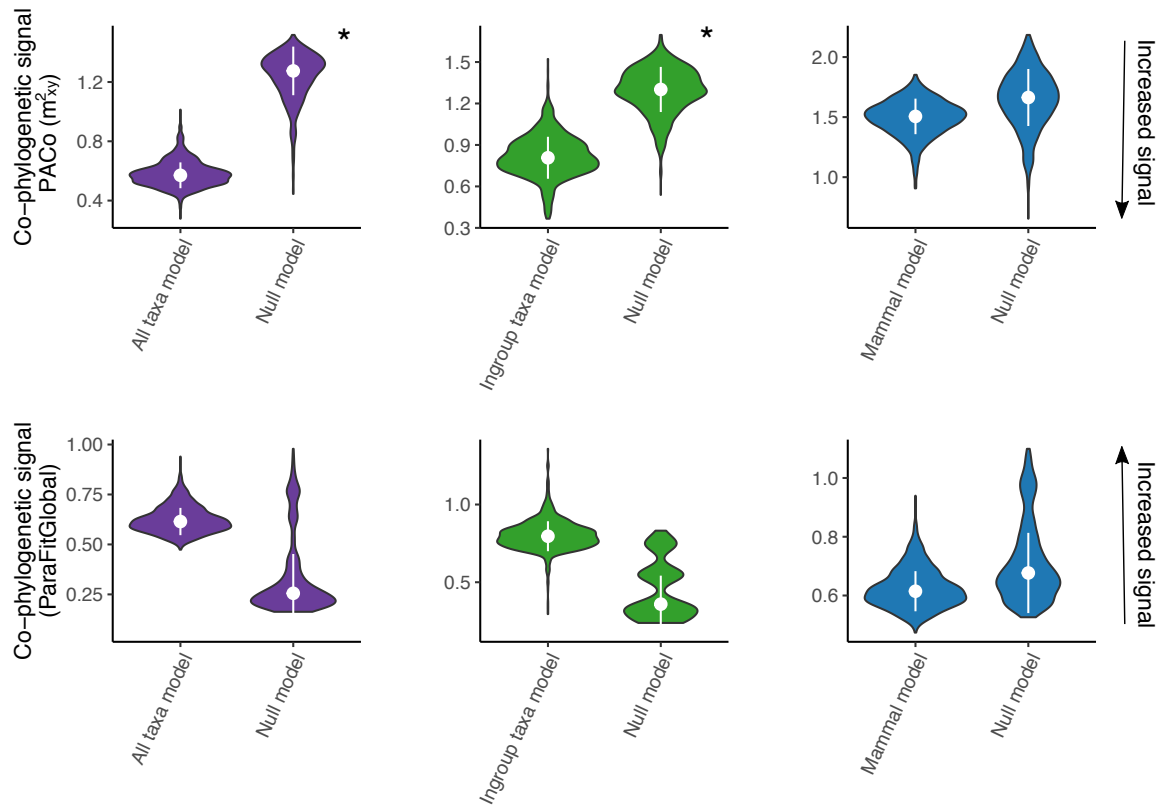

**Fig. S4. Co-phylogenetic signal in subsets of the deltavirus phylogeny.** Violin plots show the degree of dependence of 1,000 phylogenies from the posterior of the StarBeast analysis (Fig. S5) on the host phylogeny relative to null models, with the median and standard deviation. Data subsets are colored as in Fig. 2B (All taxa: purple+green+blue, Ingroup: green+blue, mammals: blue) Distributions are shown for analyses performed using PACo (top row) and ParaFit (bottom row). Asterisks show significant dependence of the virus phylogeny on the host phylogeny ( $P < 0.05$ ). Note that lower values of the empirical model relative to the null model represent increased signal of co-phylogeny in PACo while higher values represent increased signal of co-phylogeny in ParaFit.

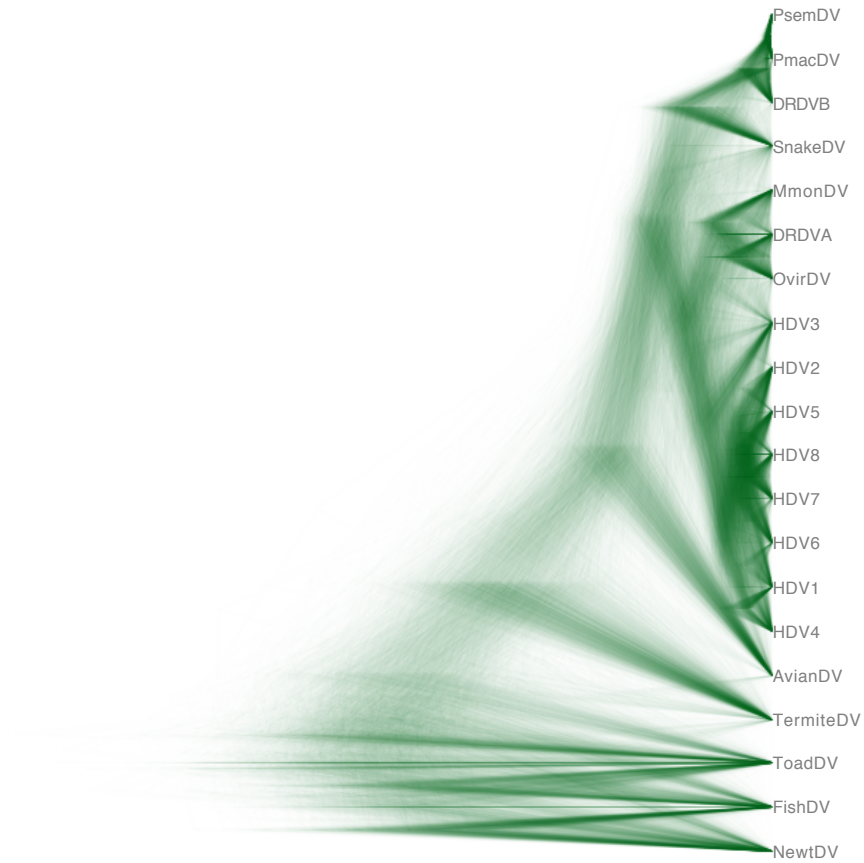

**Fig. S5. Uncertainty of deep relationships in the deltavirus phylogeny.** The DensiTree shows the distribution of 1,000 posterior trees from the StarBeast analysis, highlighting uncertainties in the evolutionary relationships among divergent deltavirus-like taxa.

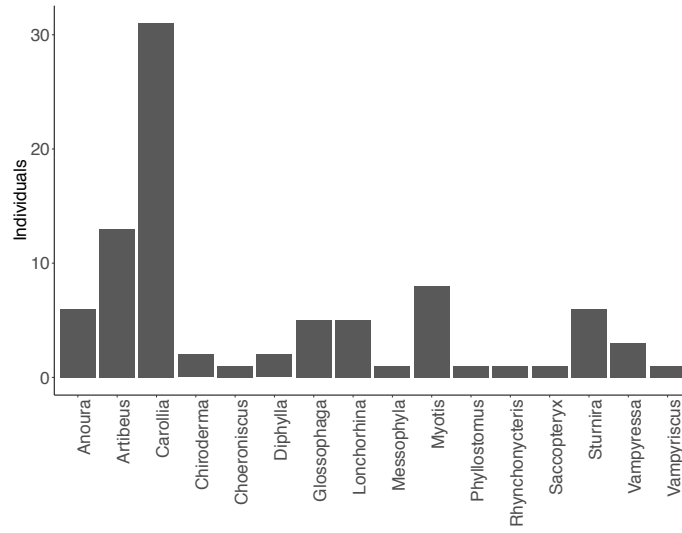

**Fig. S6. Counts of non-*D. rotundus* bat species saliva swabs individually screened by RT-PCR for DrDV-B. Bars group bats by genus.**

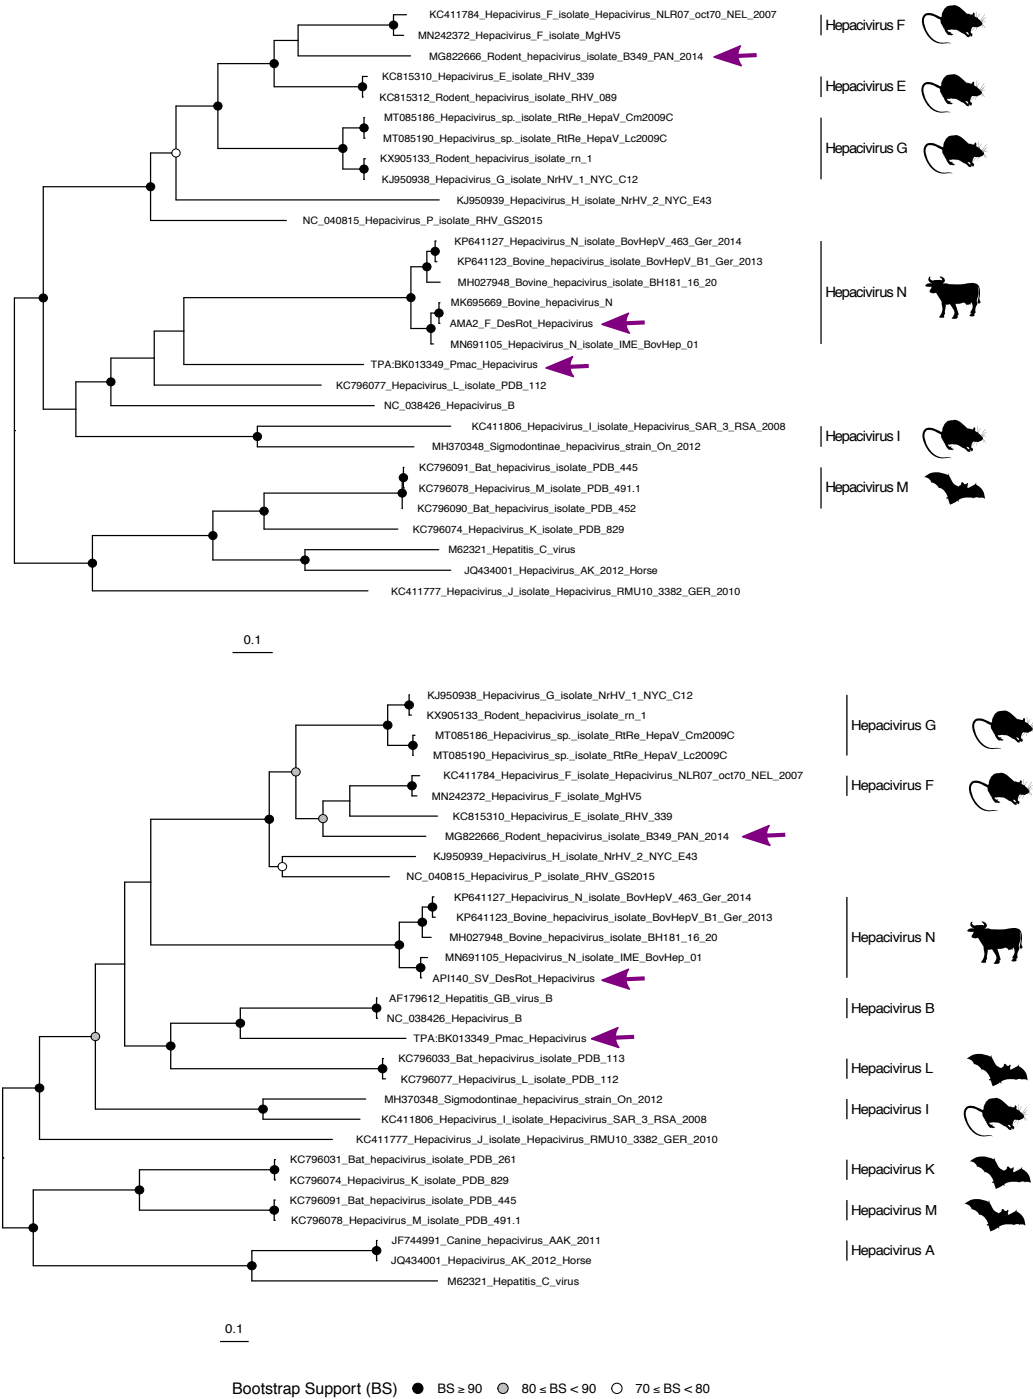

**Fig. S7. Relationships between hepaciviruses from deltavirus-positive hosts.** Phylogenies shown are based on amino acid alignments of the hepacivirus genes NS3 (upper) and NS5B (lower). Hepacivirus species with multiple representatives are denoted with vertical lines. Silhouettes show host associations for key hepacivirus species. Purple arrows indicate hepaciviruses detected in deltavirus-positive hosts (*Peropteryx macrotis*, *Desmodus rotundus*, and *Proechimys semispinosus*). Maximum likelihood phylogenies with 1,000 bootstrap replicates were generated using IQTree (7) using the best fit models LG+F+I+G4 (NS3) and LG+I+G4 (NS5B) selected by ModelFinder within IQTree 2 (8).

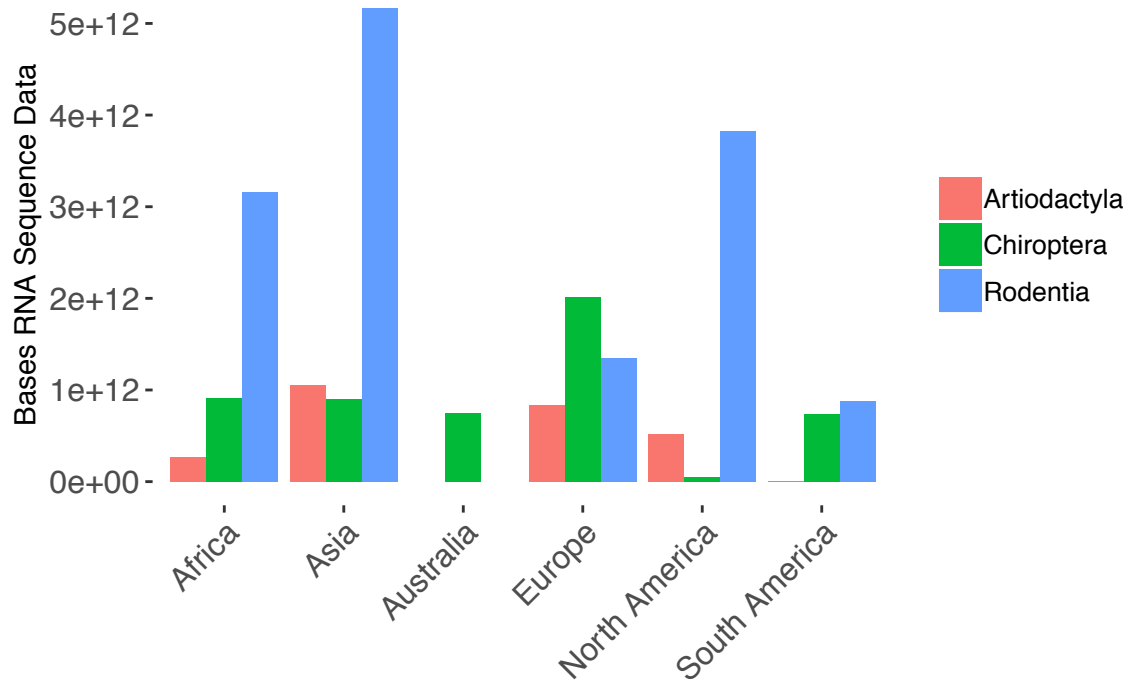

**Fig S8. Continent level geographic biases in RNA sequence data examined by Serratus.** Bars are colored by mammalian order; data shown are limited to the three orders in which deltaviruses were detected.

A

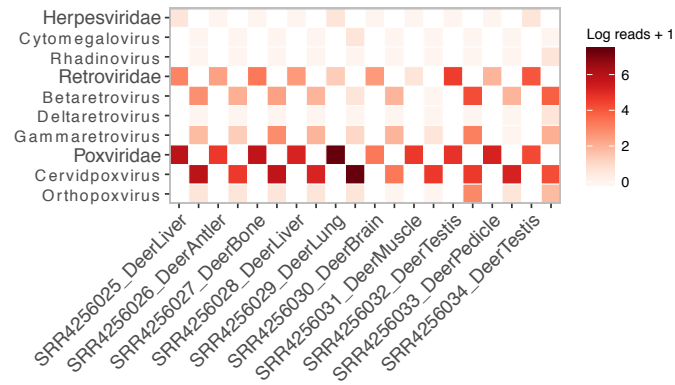

B

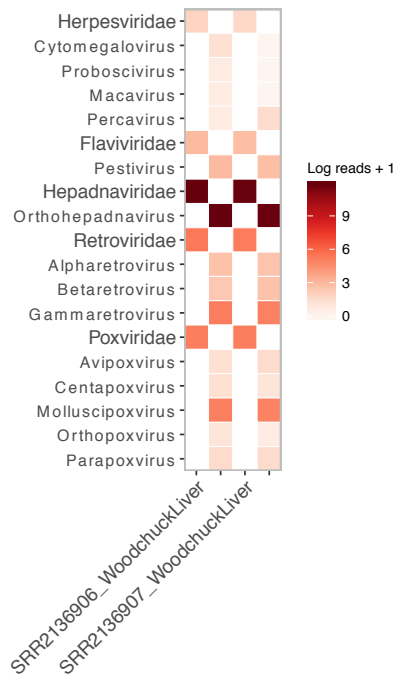

**Fig S9. Candidate helper viruses for the OvirDV and MmonDV datasets.** Mammal-infecting viral communities are shown for (A) *O. virginianus* libraries sequenced by RNASeq from (9), several of which contained OvirDV and (B) two *M. monax* samples infected with MmonDV from (10). Viral families (in larger font) and genera are shown in adjacent columns for each sample, with families on the left and genera on the right.

## Supplementary Tables

**Table S1. Pooled bat saliva samples from Peru analyzed by metagenomic sequencing.**

| Genus                                    | Species                                                                                                                                                                                                                                             | Individuals in pool | Raw reads  | Deltavirus contig length (nt) |
|------------------------------------------|-----------------------------------------------------------------------------------------------------------------------------------------------------------------------------------------------------------------------------------------------------|---------------------|------------|-------------------------------|
| <i>Carollia</i>                          | <i>perspicillata</i>                                                                                                                                                                                                                                | 10*                 | 28,700,978 | N                             |
| <i>Glossophaga</i>                       | <i>soricina</i>                                                                                                                                                                                                                                     | 5                   | 24,079,752 | N                             |
| <i>Desmodus</i>                          | <i>rotundus</i>                                                                                                                                                                                                                                     | 10                  | 28,946,275 | 921 <sup>†</sup>              |
| <i>Diphylla</i>                          | <i>ecaudata</i>                                                                                                                                                                                                                                     | 2                   | 25,023,095 | N                             |
| <i>Anoura</i>                            | <i>geoffroyi</i><br><i>peruana</i>                                                                                                                                                                                                                  | 6                   | 18,569,505 | N                             |
| <i>Artibeus</i>                          | <i>lituratus</i><br><i>obscurus</i><br><i>planirostris</i><br><i>fraterculus</i>                                                                                                                                                                    | 10                  | 14,966,399 | N                             |
| <i>Myotis</i>                            | <i>oxyotus</i><br><i>unidentified sp</i>                                                                                                                                                                                                            | 8                   | 19,934,479 | N                             |
| <i>Sturnira</i>                          | <i>erythromos</i><br><i>unidentified sp</i>                                                                                                                                                                                                         | 6                   | 11,348,995 | N                             |
| <i>Vampyressa/</i><br><i>Vampyriscus</i> | <i>bidens</i><br><i>unidentified sp</i>                                                                                                                                                                                                             | 4                   | 13,734,389 | N                             |
| <i>Rare species</i>                      | <i>Chiroderma trinitatum</i><br><i>Chiroderma salvini</i><br><i>Choeroniscus minor</i><br><i>Rhynchonycteris naso</i><br><i>Saccopteryx bilineata</i><br><i>Messophyla macconelli</i><br><i>Phyllostomus discolor</i><br><i>Rhinophylla pumilio</i> | 8                   | 16,746,795 | N                             |

\*Pool included individual CP-1 in which DrDV-B was detected by RT-PCR

<sup>†</sup>Pool was identical to CAJ1 pool where DrDV was initially discovered, confirming the ability to detect deltaviruses when they are known to be present



**Table S2. Deltavirus positive cohorts evaluated by mapping reads from related libraries to novel deltavirus genomes.**

| SRA accession              | Pool ID     | Host <sup>§</sup>        | DV Reads <sup>¶</sup>       |
|----------------------------|-------------|--------------------------|-----------------------------|
| <a href="#">ERR2756783</a> | AAC_H_F     | <i>Desmodus rotundus</i> | 2 (DrDV-A)                  |
| <a href="#">ERR2756784</a> | AAC_H_SV*   | <i>Desmodus rotundus</i> | 189 (DrDV-A)<br>18 (DrDV-B) |
| <a href="#">ERR2756785</a> | AAC_L_F     | <i>Desmodus rotundus</i> | 0                           |
| <a href="#">ERR2756786</a> | AAC_L_SV    | <i>Desmodus rotundus</i> | 0                           |
| <a href="#">ERR2756787</a> | AMA_L_F_NR  | <i>Desmodus rotundus</i> | 0                           |
| <a href="#">ERR2756788</a> | AMA_L_F_R   | <i>Desmodus rotundus</i> | 0                           |
| <a href="#">ERR2756789</a> | AMA_L_SV    | <i>Desmodus rotundus</i> | 0                           |
| <a href="#">ERR2756790</a> | CAJ_L_F_NR  | <i>Desmodus rotundus</i> | 0                           |
| <a href="#">ERR2756791</a> | CAJ_L_F_R   | <i>Desmodus rotundus</i> | 0                           |
| <a href="#">ERR2756792</a> | CAJ_L_SV    | <i>Desmodus rotundus</i> | 4                           |
| <a href="#">ERR2756793</a> | CAJ_H_F_1   | <i>Desmodus rotundus</i> | 0                           |
| <a href="#">ERR2756794</a> | CAJ_H_F_2   | <i>Desmodus rotundus</i> | 4                           |
| <a href="#">ERR2756795</a> | CAJ_H_SV*   | <i>Desmodus rotundus</i> | 169                         |
| <a href="#">ERR2756796</a> | HUA_H_F     | <i>Desmodus rotundus</i> | 2                           |
| <a href="#">ERR2756797</a> | HUA_H_SV    | <i>Desmodus rotundus</i> | 0                           |
| <a href="#">ERR2756798</a> | LMA_L_F_NR  | <i>Desmodus rotundus</i> | 0                           |
| <a href="#">ERR2756799</a> | LMA_L_F_R   | <i>Desmodus rotundus</i> | 0                           |
| <a href="#">ERR2756800</a> | LMA_L_SV_NR | <i>Desmodus rotundus</i> | 45                          |
| <a href="#">ERR2756801</a> | LMA_L_SV_R* | <i>Desmodus rotundus</i> | 320                         |
| <a href="#">ERR2756802</a> | LR_L_F_NR   | <i>Desmodus rotundus</i> | 0                           |
| <a href="#">ERR2756803</a> | LR_L_F_R    | <i>Desmodus rotundus</i> | 0                           |
| <a href="#">ERR2756804</a> | LR_L_SV     | <i>Desmodus rotundus</i> | 0                           |
| <a href="#">ERR3569452</a> | AMA2_H      | <i>Desmodus rotundus</i> | 0                           |
| <a href="#">ERR3569453</a> | AMA2_SV     | <i>Desmodus rotundus</i> | 0                           |
| <a href="#">ERR3569454</a> | API1_H      | <i>Desmodus rotundus</i> | 0                           |
| <a href="#">ERR3569455</a> | API1_SV     | <i>Desmodus rotundus</i> | 0                           |
| <a href="#">ERR3569456</a> | API17_H     | <i>Desmodus rotundus</i> | 0                           |
| <a href="#">ERR3569457</a> | API17_SV    | <i>Desmodus rotundus</i> | 2 (DrDV-A)                  |
| <a href="#">ERR3569458</a> | API140_H    | <i>Desmodus rotundus</i> | 32                          |
| <a href="#">ERR3569459</a> | API140_SV   | <i>Desmodus rotundus</i> | 0                           |
| <a href="#">ERR3569460</a> | API141_H    | <i>Desmodus rotundus</i> | 0                           |
| <a href="#">ERR3569461</a> | API141_SV   | <i>Desmodus rotundus</i> | 0                           |
| <a href="#">ERR3569462</a> | AYA1_H      | <i>Desmodus rotundus</i> | 2                           |
| <a href="#">ERR3569463</a> | AYA1_SV     | <i>Desmodus rotundus</i> | 0                           |
| <a href="#">ERR3569464</a> | AYA7_H      | <i>Desmodus rotundus</i> | 0                           |
| <a href="#">ERR3569465</a> | AYA7_SV     | <i>Desmodus rotundus</i> | 18                          |
| <a href="#">ERR3569466</a> | AYA11_H     | <i>Desmodus rotundus</i> | 0                           |

|                            |           |                                 |                            |
|----------------------------|-----------|---------------------------------|----------------------------|
| <a href="#">ERR3569467</a> | AYA11_SV* | <i>Desmodus rotundus</i>        | 591                        |
| <a href="#">ERR3569468</a> | AYA12_H   | <i>Desmodus rotundus</i>        | 0                          |
| <a href="#">ERR3569469</a> | AYA12_SV  | <i>Desmodus rotundus</i>        | 2                          |
| <a href="#">ERR3569470</a> | AYA14_H   | <i>Desmodus rotundus</i>        | 0                          |
| <a href="#">ERR3569471</a> | AYA14_SV* | <i>Desmodus rotundus</i>        | 228 (DrDV-A)<br>2 (DrDV-B) |
| <a href="#">ERR3569472</a> | AYA15_H   | <i>Desmodus rotundus</i>        | 0                          |
| <a href="#">ERR3569473</a> | AYA15_SV  | <i>Desmodus rotundus</i>        | 0                          |
| <a href="#">ERR3569474</a> | CAJ1_H    | <i>Desmodus rotundus</i>        | 0                          |
| <a href="#">ERR3569475</a> | CAJ1_SV*  | <i>Desmodus rotundus</i>        | 172                        |
| <a href="#">ERR3569476</a> | CAJ2_H    | <i>Desmodus rotundus</i>        | 4                          |
| <a href="#">ERR3569477</a> | CAJ2_SV†  | <i>Desmodus rotundus</i>        | 0                          |
| <a href="#">ERR3569478</a> | CAJ4_H    | <i>Desmodus rotundus</i>        | 0                          |
| <a href="#">ERR3569479</a> | CAJ4_SV†  | <i>Desmodus rotundus</i>        | 0                          |
| <a href="#">ERR3569480</a> | CUS8_H    | <i>Desmodus rotundus</i>        | 0                          |
| <a href="#">ERR3569481</a> | CUS8_SV   | <i>Desmodus rotundus</i>        | 4                          |
| <a href="#">ERR3569482</a> | HUA1_H    | <i>Desmodus rotundus</i>        | 0                          |
| <a href="#">ERR3569483</a> | HUA1_SV   | <i>Desmodus rotundus</i>        | 0                          |
| <a href="#">ERR3569484</a> | HUA2_H    | <i>Desmodus rotundus</i>        | 5                          |
| <a href="#">ERR3569485</a> | HUA2_SV   | <i>Desmodus rotundus</i>        | 0                          |
| <a href="#">ERR3569486</a> | HUA3_H    | <i>Desmodus rotundus</i>        | 0                          |
| <a href="#">ERR3569487</a> | HUA3_SV   | <i>Desmodus rotundus</i>        | 0                          |
| <a href="#">ERR3569488</a> | HUA4_H    | <i>Desmodus rotundus</i>        | 0                          |
| <a href="#">ERR3569489</a> | HUA4_SV   | <i>Desmodus rotundus</i>        | 0                          |
| <a href="#">ERR3569490</a> | LMA5_H    | <i>Desmodus rotundus</i>        | 0                          |
| <a href="#">ERR3569491</a> | LMA5_SV   | <i>Desmodus rotundus</i>        | 8                          |
| <a href="#">ERR3569492</a> | LMA6_H    | <i>Desmodus rotundus</i>        | 0                          |
| <a href="#">ERR3569493</a> | LMA6_SV*  | <i>Desmodus rotundus</i>        | 173                        |
| <a href="#">ERR3569494</a> | LR2_H     | <i>Desmodus rotundus</i>        | 0                          |
| <a href="#">ERR3569495</a> | LR2_SV    | <i>Desmodus rotundus</i>        | 0                          |
| <a href="#">ERR3569496</a> | LR3_H     | <i>Desmodus rotundus</i>        | 0                          |
| <a href="#">ERR3569497</a> | LR3_SV    | <i>Desmodus rotundus</i>        | 0                          |
| <a href="#">SRR7910142</a> | Pm_03     | <i>Peropteryx macrotis</i>      | 0                          |
| <a href="#">SRR7910143</a> | Pm_01*    | <i>Peropteryx macrotis</i>      | 346                        |
| <a href="#">SRR7910144</a> | Pm_02     | <i>Peropteryx macrotis</i>      | 2                          |
| <a href="#">SRR7910145</a> | NI_02‡    | <i>Nyctinomops laticaudatus</i> | 0                          |
| <a href="#">SRR7910146</a> | NI_03‡    | <i>Nyctinomops laticaudatus</i> | 0                          |
| <a href="#">SRR7910147</a> | Mk_01‡    | <i>Myotis keaysi</i>            | 0                          |
| <a href="#">SRR7910148</a> | Mk_02‡    | <i>Myotis keaysi</i>            | 0                          |
| <a href="#">SRR7910149</a> | Mm_02‡    | <i>Mormoops megalophylla</i>    | 0                          |
| <a href="#">SRR7910150</a> | Mm_03‡    | <i>Mormoops megalophylla</i>    | 0                          |

|                            |                    |                                 |      |
|----------------------------|--------------------|---------------------------------|------|
| <a href="#">SRR7910151</a> | Aj_03 <sup>‡</sup> | <i>Artibeus jamaicensis</i>     | 0    |
| <a href="#">SRR7910152</a> | Mm_01 <sup>‡</sup> | <i>Mormoops megalophylla</i>    | 0    |
| <a href="#">SRR7910153</a> | Aj_01 <sup>‡</sup> | <i>Artibeus jamaicensis</i>     | 0    |
| <a href="#">SRR7910154</a> | Aj_02 <sup>‡</sup> | <i>Artibeus jamaicensis</i>     | 0    |
| <a href="#">SRR7910155</a> | Mk_03 <sup>‡</sup> | <i>Myotis keaysi</i>            | 0    |
| <a href="#">SRR7910156</a> | NI_01 <sup>‡</sup> | <i>Nyctinomops laticaudatus</i> | 0    |
| <a href="#">SRR4256025</a> | Deer-Liver-1-male  | <i>Odocoileus virginianus</i>   | 0    |
| <a href="#">SRR4256026</a> | Deer-Antler-2-male | <i>Odocoileus virginianus</i>   | 12   |
| <a href="#">SRR4256027</a> | Deer-Bone-1-male   | <i>Odocoileus virginianus</i>   | 0    |
| <a href="#">SRR4256028</a> | Deer-Liver-2-male  | <i>Odocoileus virginianus</i>   | 0    |
| <a href="#">SRR4256029</a> | Deer-Lung-1-male   | <i>Odocoileus virginianus</i>   | 0    |
| <a href="#">SRR4256030</a> | Deer-Brain-2-male  | <i>Odocoileus virginianus</i>   | 12   |
| <a href="#">SRR4256031</a> | Deer-Muscle-2-male | <i>Odocoileus virginianus</i>   | 14   |
| <a href="#">SRR4256032</a> | Deer-Testis-1-male | <i>Odocoileus virginianus</i>   | 0    |
| <a href="#">SRR4256033</a> | Deer-Pedicle-male* | <i>Odocoileus virginianus</i>   | 9265 |
| <a href="#">SRR4256034</a> | Deer-Testis-2-male | <i>Odocoileus virginianus</i>   | 7    |

\* Pools in which full deltavirus genomes were detected

† Pools in which DrDV was detected in the saliva of one or more individuals in the pool by RT-PCR, but were negative for deltavirus detection through metagenomics

‡Species in which deltaviruses were not detected but which came from the same study

§*D. rotundus* samples represent saliva (SV) and fecal (F/H) samples pooled across multiple individuals from different sites. Samples from other Neotropical bats (*P. macrotis*, *N. laticaudatus*, *M. keaysi*, *M. megalophylla*, *A. jamaicensis*) represent liver samples from unique individuals. *O. virginianus* samples represent different tissues pooled across multiple individuals. Read mapping of samples from different individuals and time points to the MmonDV genome is described in (4)

¶Samples from *D. rotundus* were mapped to DrDV-A and DrDV-B genomes. All *D. rotundus* read counts refer to DrDV-B genomes unless specifically noted as DrDV-A. In the case of libraries with matches to both, the number of reads mapping is broken down by DrDV-genome. Samples from *P. macrotis*, *N. laticaudatus*, *M. keaysi*, *M. megalophylla*, *A. jamaicensis* were mapped to the PmacDV genome. Samples from *O. virginianus* were mapped to OvirDV.

**Table S3. Summary statistics for bat deltavirus genomes and protein domain homology analysis of predicted DrDV small delta antigens from saliva metagenomic pools.**

| Site  | Lineage | Genome (nt) | GC content (%) | Intramolecular base pairing (%) | Delta antigen (aa) | Hhpred top hit                    | Probability top hit | e-value  | Identity top hit (%) | Genbank accession |
|-------|---------|-------------|----------------|---------------------------------|--------------------|-----------------------------------|---------------------|----------|----------------------|-------------------|
| AYA14 | DrDV-A  | 1694        | 55             | 73.8                            | 194                | Oligomerization                   | 99.86               | 2.8e-25  | 59                   | MT649207          |
| AYA11 | DrDV-B  | 1692        | 54.3           | 75.3                            | 196                | domain of hepatitis delta antigen | 99.86               | 5.60E-25 | 45                   | MT649206          |
| CAJ1  | DrDV-B  | 1692        | 53.8           | 74.3                            | 196                |                                   | 99.86               | 5.40E-25 | 45                   | MT649208          |
| LMA6  | DrDV-B  | 1694        | 54.3           | 74.6                            | 196                |                                   | 99.85               | 8.30E-25 | 45                   | MT649209          |

**Table S4. Primers used to screen samples for DrDV by RT-PCR and HBV by PCR.**

| Primer               | PCR Round | Sequence (5'-3')           |
|----------------------|-----------|----------------------------|
| DrDV-A               |           |                            |
| DrDV_F1_GenoA        | 1&2       | AGGGGTCTTTTTGGGAAATT       |
| DrDV_R1_GenoA        | 1         | AAGAAGAAGCAACTATCCGG       |
| DrDV_R2_GenoA        | 2         | CATCCAAGAGACCAAGAGAG       |
| DrDV-B               |           |                            |
| DrDV_F1_GenoB        | 1         | TTCCCTTGYTGCTCCAGTTG       |
| DrDV_R1_GenoB        | 1         | CGGTAAGAAGAAACCTCCAA       |
| DrDV_F2_GenoB        | 2         | CCAGTTGTTTCTTCTTGTTC       |
| DrDV_R2_GenoB        | 2         | AAAAAGAAAGAGAGAACTGGAAAA   |
| DrDV Delta Antigen   |           |                            |
| DeltaAntigenF1_GenoB | 1         | TCTGGTCTTATCTTTCTTACCTTAT  |
| DeltaAntigenR1_GenoB | 1         | AAACCTTCCTTTATTCTATTTGAA   |
| DeltaAntigenR1_GenoA | 1         | CCTTTACCTTTAATTCTCTTGGTAA  |
| DeltaAntigenF1_GenoA | 1         | GCCTCGAATAATAAGAAGAAAATTT  |
| HBV Primers*         |           |                            |
| HBV-F248             | 1&2       | CTAGATTBGTGGTGGACTTCTCTCA  |
| HBV-R397             | 2         | GATARAACGCCGAGATACATCCA    |
| HBV-R450a            | 1         | TCCAGGAGAACCAAYAAGAAAGTGA  |
| HBV-R450b            | 1         | TCCAGGAGAACCAAYAAGAAAGATGA |

\*Primer sequences and PCR protocol described in (11)

**Table S5. Colony level demographic characteristics and PCR-based screening results of vampire bat blood and saliva for DrDV and HBV.**

| Colony | Prop Male* | Prop Adult† | DrDV-A |       | DrDV-B |       | HBV    |       |
|--------|------------|-------------|--------|-------|--------|-------|--------|-------|
|        |            |             | Saliva | Blood | Saliva | Blood | Saliva | Blood |
| AYA1   | 0.6        | 1           | 0/20   | 0/20  | 3/20   | 0     | 0/3    | 0/20  |
| AYA11  | 0.6        | 0.95        | 0/20   | 0/20  | 2/20   | 0     | 0/3    | 0/20  |
| AYA14  | 0.4        | 0.65        | 1/20   | 0/20  | 4/20   | 0     | 0/8    | 0/20  |
| AYA15  | 0.55       | 0.75        | 0/20   | 0     | 0/20   | 0     | 0      | 0     |
| CAJ1   | 0.75       | 0.9         | 0/20   | 0     | 5/20   | 0/20  | 0/10   | 0/20  |
| CAJ2   | 0.55       | 0.95        | 0/20   | 0     | 6/20   | 6/20  | 0/6    | 0/20  |
| CAJ3   | 0.7        | 1           | 0/20   | 0     | 4/20   | 0     | 0/4    | 0     |
| CAJ4   | 0.35       | 0.75        | 0/20   | 0     | 2/20   | 0     | 0/2    | 0     |
| LMA4   | 0.65       | 0.75        | 0/20   | 0     | 0/20   | 0     | 0/1    | 0     |
| LMA5   | 0.65       | 0.9         | 0/20   | 0     | 5/20   | 0     | 0/5    | 0     |
| LMA6   | 0.35       | 1           | 0/20   | 0     | 7/20   | 4/20  | 0/9    | 0/19  |
| LMA12  | 0.5        | 0.9         | 0/20   | 0     | 3/20   | 0     | 0/3    | 0     |
| Total  | -          | -           | 1/240  | 0/60  | 41/240 | 10/60 | 0/54   | 0/119 |

\*Proportion of males at each colony (alternative is females)

†Proportion of adults at each colony (alternatives are juveniles or subadults)

**Table S6. Test of association between DrDV-B phylogeny and sample location at the regional (department) and colony level.**

| Level  | Index       | Observed value (95% CI) | Null value (95% CI) | p-value |
|--------|-------------|-------------------------|---------------------|---------|
| Region | AI*         | 0.22 (0-0.58)           | 2.46 (1.95-2.94)    | 0       |
|        | PS†         | 4 (3-5)                 | 17.73 (15.41-19.35) | 0       |
|        | MC‡ (LMA)   | 9.29 (5-14)             | 1.97 (1.41-2.98)    | 0.001   |
|        | MC‡ (CAJ)   | 11.24 (9-19)            | 2.81 (2.12-3.94)    | 0.001   |
|        | MC‡ (AYA)   | 2.67 (1-5)              | 1.26 (1-1.96)       | 0.02    |
| Colony | AI*         | 2.23 (1.69-2.76)        | 3.63 (3.21-3.92)    | 0       |
|        | PS†         | 19.19 (18-20)           | 29.23 (27.45-30.81) | 0       |
|        | MC‡ (LMA6)  | 4.98 (5-5)              | 1.18 (1-1.94)       | 0.001   |
|        | MC‡ (LMA5)  | 2.52 (1-3)              | 1.13 (1-1.43)       | 0.002   |
|        | MC‡ (CAJ2)  | 3.21 (2-6)              | 1.57 (1.14-2.39)    | 0.01    |
|        | MC‡ (CAJ1)  | 1 (1-1)                 | 1.13 (1-1.53)       | 1       |
|        | MC‡ (AYA1)  | 1.09 (1-2)              | 1.01 (1-1.05)       | 1       |
|        | MC‡ (CAJ3)  | 1.01 (1-1)              | 1.07 (1-1.32)       | 1       |
|        | MC‡ (AYA11) | 1.03 (1-1)              | 1.01 (1-1.05)       | 1       |
|        | MC‡ (AYA14) | 1.05 (1-2)              | 1.04 (1-1.15)       | 1       |
|        | MC‡ (CAJ4)  | 1.16 (1-2)              | 1.01 (1-1.05)       | 1       |
|        | MC‡ (LMA12) | 1 (1-1)                 | 1.04 (1-1.15)       | 1       |

\*Association Index

† Parsimony Score

‡ Monophyletic Clade size

**Dataset S1 (separate file). Merged Serratus and Pantheria datasets.** Data S1 is an excel file containing merged datasets used to evaluate geographic and taxonomic biases in SRA searches.

**Dataset S2 (separate file). Full delta antigen alignment.** Data S2 is a fasta file which is a trimmed alignment of the amino acid sequence of the full delta antigen used to evaluate relationships between deltavirus representatives from different hosts.

**Dataset S3 (separate file). Vampire bat deltavirus infections.** Data S3 is an excel file containing individual level infection data for vampire bats screened by PCR for DrDV-B along with demographic data used in statistical analyses.

**Dataset S4 (separate file). DrDV-B partial delta antigen alignment.** Data S4 is a fasta file which is a trimmed alignment of the nucleotide sequence of the partial delta antigen fragment used to evaluate relationships between deltaviruses detected in vampire bats from different regions of Peru. A DrDV-B sequence detected in a co-roosting *C. perspicillata* individual is also included in this alignment.



## Supplementary References

1. Casey JL, Bergmann KF, Brown TL, Gerin JL (1992) Structural requirements for RNA editing in hepatitis delta virus: evidence for a uridine-to-cytidine editing mechanism. *Proc Natl Acad Sci USA* 89(15):7149–7153.
2. Hwang SB, Lai M (1993) Isoprenylation Mediates Direct Protein-Protein Interactions Between Hepatitis Large Delta-Antigen and Hepatitis-B Virus Surface-Antigen. *J Virol* 67(12):7659–7662.
3. Wille M, et al. (2018) A Divergent Hepatitis D-Like Agent in Birds. *Viruses* 10(12):720–9.
4. Edgar RC, et al. (2020) Petabase-scale sequence alignment catalyses viral discovery. *bioRxiv*:1–30.
5. Webb C-HT, Lupták A (2014) HDV-like self-cleaving ribozymes. *RNA Biol* 8(5):719–727.
6. Hetzel U, et al. (2019) Identification of a Novel Deltavirus in Boa Constrictors. *mBio* 10(2):1447–8.
7. Minh BQ, et al. (2020) IQ-TREE 2: New Models and Efficient Methods for Phylogenetic Inference in the Genomic Era. *Mol Biol Evol* 37(5):1530–1534.
8. Kalyaanamoorthy S, Minh BQ, Wong TKF, Haeseler von A, Jermini LS (2017) ModelFinder: fast model selection for accurate phylogenetic estimates. *Nat Meth* 14(6):587–589.
9. Seabury CM, et al. (2011) Genome-Wide Polymorphism and Comparative Analyses in the White-Tailed Deer (*Odocoileus virginianus*): A Model for Conservation Genomics. *PLOS ONE* 6(1):e15811–9.
10. Fletcher SP, et al. (2015) Intrahepatic Transcriptional Signature Associated with Response to Interferon- $\alpha$  Treatment in the Woodchuck Model of Chronic Hepatitis B. *PLoS Pathog* 11(9):e1005103–30.
11. Drexler JF, et al. (2013) Bats carry pathogenic hepadnaviruses antigenically related to hepatitis B virus and capable of infecting human hepatocytes. *Proc Natl Acad Sci USA* 110(40):16151–16156.
